# Supplementary material for: Thermally-driven unusual dual SHG switching with wide SHG-active steps triggered by inverse symmetry breaking
Source: Royal Society of Chemistry journal article supplement (doi:10.1039/d2qi00964a), 2022-01-01
Supplement: d2qi00964a1.pdf [file d2qi00964a1.pdf]

## Supporting Information

### **Thermal-driven unusual dual SHG switching with wide SHG-active step triggered by inverse symmetry breaking**

Tie Zhang<sup>a</sup>, Junyi Li<sup>a</sup>, Guowei Du<sup>a</sup>, Kun Ding<sup>a,b</sup>, Xiaogang Chen<sup>a</sup>, Yi Zhang<sup>\*a,c</sup> & Dawei Fu<sup>\*b</sup>

<sup>a</sup>*Ordered Matter Science Research Center, Jiangsu Key Laboratory for Science and Applications of Molecular Ferroelectrics, Southeast University, Nanjing 211189, China*

<sup>b</sup>*Institute for Science and Applications of Molecular Ferroelectrics, Key Laboratory of the Ministry of Education for Advanced Catalysis Materials, Zhejiang Normal University, Jinhua, 321004, China*

<sup>c</sup>*Chaotic Matter Science Research Center, Department of Materials, Metallurgy and Chemistry, Jiangxi University of Science and Technology, Ganzhou 341000, China*

\*Corresponding author: [yizhang1980@seu.edu.cn](mailto:yizhang1980@seu.edu.cn); [dawei@seu.edu.cn](mailto:dawei@seu.edu.cn)

#### **This file includes:**

Supplementary Text: Theoretical Calculation, IR spectrum description, and **TMFECdBr<sub>3</sub>**.

Figures. S1 to S18

Tables S1 to S2

References

**Theoretical Calculation.** The electronic structure calculations including the electronic band structures and the density of states of (TMCE)<sub>2</sub>CdBr<sub>4</sub> were performed based on density functional theory (DFT) by using the CASTEP. Construct the theoretical mode by using the crystal structure data at 300 K of (TMCE)<sub>2</sub>CdBr<sub>4</sub>. The exchange and correlation effects used Perdew–Burke–Ernzerhof to treat in the generalized gradient approximation. In addition, the core-electron interactions were described by the norm-conserving pseudopotential. The plane wave cutoff energy and the convergence threshold of total energy were set to 760 eV and 10<sup>-5</sup> eV per atom, respectively. The other parameters and convergent criteria were the default values of the CASTP code.<sup>1-2</sup>

The linear optical properties were examined based on the dielectric function  $\varepsilon(\omega) = \varepsilon_1(\omega) + i\varepsilon_2(\omega)$ . The imaginary part of dielectric function  $\varepsilon_2$  can be calculated based on the electronic structures and the real part is obtained by the Kramers-Kronig transformation,<sup>3</sup>

accordingly, the refractive indices and the birefringence ( $\Delta n$ ) can be calculated based on the optimized geometry structure of  $(\text{TMCE})_2\text{CdBr}_4$ .

**IR spectrum description.** The stronger peak at around  $775\text{ cm}^{-1}$  is assigned to the characteristic absorption peak of the C–Cl bond of the cation, and the peaks at around  $750\text{--}700\text{ cm}^{-1}$  are assigned to the rocking vibration of R–CH<sub>2</sub>CH<sub>2</sub>–R. The absorption bands of  $3025\text{--}2950\text{ cm}^{-1}$  are characteristic absorption bands of  $\nu_{\text{CH}_3}$  and  $\nu_{\text{CH}_2}$ , and the wider absorption band in the range of  $1250\text{--}1020\text{ cm}^{-1}$  is related to the characteristic absorption of  $\nu_{\text{C-N}}$ . Meanwhile, the characteristic absorption bands of  $\delta_{\text{-CH}_3}$  are located at  $1465\text{ cm}^{-1}$ .

**TMFECdBr<sub>3</sub>** (TMFE: (2-fluoroethyl)trimethylammonium). We used the same way ( $(\text{TMCE})_2\text{CdBr}_4$ ) to synthesize the compound  $\text{TMFECdBr}_3$ , which belongs to the centrosymmetric space group  $P2_1/c$ . Therefore, it has no SHG signals and no temperature-dependent SHG characteristics. As for its specific structure, the crystal cell parameters are  $a=10.1761(5)\text{ \AA}$ ,  $b=15.8039(9)\text{ \AA}$ ,  $c=7.0554(3)\text{ \AA}$ ,  $\beta=94.275(4)^\circ$ ,  $V=1131.51\text{ \AA}^3$  (Table S1). And it shows a one-dimensional chain structure and organic cations distributed among them, which is different from  $(\text{TMCE})_2\text{CdBr}_4$  and  $(\text{TMBE})_2\text{CdBr}_4$  (Fig. S18).

**Table S1.** Crystal data and structure refinements of compound  $(\text{TMCE})_2\text{CdBr}_4$  and **TMFECdBr<sub>3</sub>**.

|                                         | 223 K                                                          | 300 K                                                          | 373 K                                                          | 243 K                                    |
|-----------------------------------------|----------------------------------------------------------------|----------------------------------------------------------------|----------------------------------------------------------------|------------------------------------------|
| Empirical formula                       | $\text{C}_{10}\text{H}_{26}\text{Cl}_2\text{N}_2\text{CdBr}_4$ | $\text{C}_{10}\text{H}_{26}\text{Cl}_2\text{N}_2\text{CdBr}_4$ | $\text{C}_{10}\text{H}_{26}\text{Cl}_2\text{N}_2\text{CdBr}_4$ | $\text{C}_5\text{H}_{13}\text{FNCdBr}_3$ |
| Formula weight                          | 677.27                                                         | 677.27                                                         | 677.27                                                         | 458.27                                   |
| Crystal system                          | Orthorhombic                                                   | Orthorhombic                                                   | Orthorhombic                                                   | Monoclinic                               |
| Space group                             | <i>Pbca</i>                                                    | <i>Pca2</i> <sub>1</sub>                                       | <i>Pbcm</i>                                                    | <i>P2</i> <sub>1</sub> / <i>c</i>        |
| a (Å)                                   | 14.5923(7)                                                     | 14.4102(8)                                                     | 12.1247(5)                                                     | 10.1761(5)                               |
| b (Å)                                   | 12.4120(7)                                                     | 11.9573(5)                                                     | 14.5686(6)                                                     | 15.8039(9)                               |
| c (Å)                                   | 23.9198(13)                                                    | 12.9232(6)                                                     | 13.0976(7)                                                     | 7.0554(3)                                |
| $\beta$ (deg)                           | 90°                                                            | 90°                                                            | 90°                                                            | 94.275°                                  |
| Volume (Å <sup>3</sup> ), Z             | 4332.4(4), 8                                                   | 2226.76(19), 4                                                 | 2313.56(18), 4                                                 | 1131.51(10), 4                           |
| D <sub>calcd</sub> / g cm <sup>-3</sup> | 2.077                                                          | 2.020                                                          | 1.869                                                          | 2.690                                    |
| F(000)                                  | 2576                                                           | 1288                                                           | 1184                                                           | 848                                      |
| Goodness-of-fit on F <sup>2</sup>       | 1.034                                                          | 1.063                                                          | 1.288                                                          | 1.078                                    |
| R <sub>1</sub> <sup>a</sup> (> 2σ)      | 0.0534                                                         | 0.0541                                                         | 0.1618                                                         | 0.0366                                   |
| wR <sub>2</sub> <sup>b</sup> (> 2σ)     | 0.1712                                                         | 0.1536                                                         | 0.4184                                                         | 0.0931                                   |

**Table S2.** Selected bond lengths [ $\text{\AA}$ ] and angles [ $^\circ$ ] for  $(\text{TMCE})_2\text{CdBr}_4$ .

|             | 223 K                         |             | 300 K                         |               | 373 K                         |
|-------------|-------------------------------|-------------|-------------------------------|---------------|-------------------------------|
| Cd-Br       | Bond lengths ( $\text{\AA}$ ) | Cd-Br       | Bond lengths ( $\text{\AA}$ ) | Cd-Br         | Bond lengths ( $\text{\AA}$ ) |
| Cd1—Br1     | 2.5642 (9)                    | Cd1—Br3     | 2.5617 (17)                   | Cd1—Br4ii     | 2.548 (3)                     |
| Cd1—Br3     | 2.5684 (11)                   | Cd1—Br1     | 2.5677 (15)                   | Cd1—Br4       | 2.548 (3)                     |
| Cd1—Br4     | 2.5696 (10)                   | Cd1—Br4     | 2.5740 (15)                   | Cd1—Br3       | 2.578 (3)                     |
| Cd1—Br2     | 2.5910 (10)                   | Cd1—Br2     | 2.5793 (12)                   | Cd1—Br2       | 2.592 (4)                     |
| Br-Cd-Br    | Bond angles ( $^\circ$ )      | Br-Cd-Br    | Bond angles ( $^\circ$ )      | Br-Cd-Br      | Bond angles ( $^\circ$ )      |
| Br1—Cd1—Br3 | 106.78 (3)                    | Br3—Cd1—Br1 | 111.93 (6)                    | Br4ii—Cd1—Br4 | 112.4 (2)                     |
| Br1—Cd1—Br4 | 111.25 (4)                    | Br3—Cd1—Br4 | 108.60 (7)                    | Br4ii—Cd1—Br3 | 110.00 (12)                   |
| Br3—Cd1—Br4 | 111.21 (4)                    | Br1—Cd1—Br4 | 107.97 (6)                    | Br4—Cd1—Br3   | 110.00 (12)                   |
| Br1—Cd1—Br2 | 111.98 (3)                    | Br3—Cd1—Br2 | 112.36 (6)                    | Br4ii—Cd1—Br2 | 109.21 (12)                   |
| Br3—Cd1—Br2 | 104.71 (3)                    | Br1—Cd1—Br2 | 109.74 (5)                    | Br4—Cd1—Br2   | 109.21 (12)                   |
| Br4—Cd1—Br2 | 110.66 (4)                    | Br4—Cd1—Br2 | 105.97 (5)                    | Br3—Cd1—Br2   | 105.81 (13)                   |

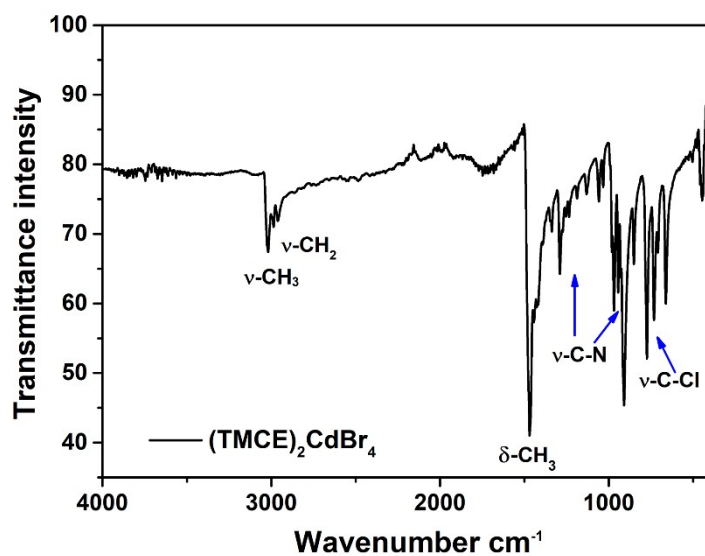

**Fig. S1** An infrared spectrum of compound  $(\text{TMCE})_2\text{CdBr}_4$ .

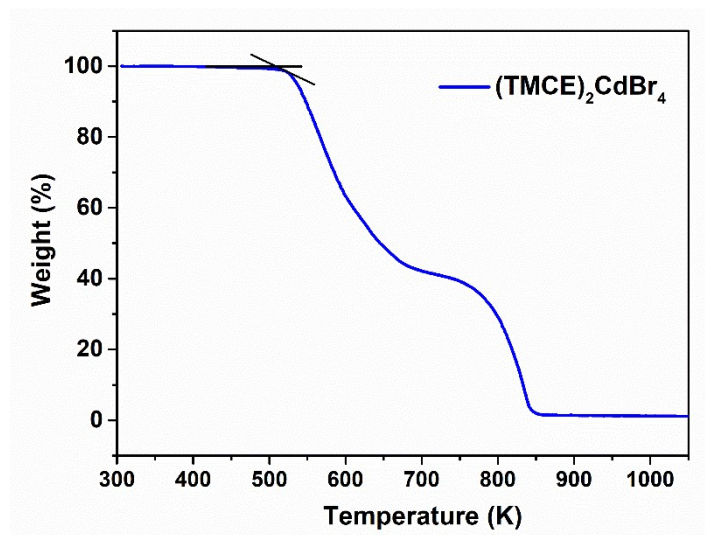

**Fig. S2** TGA curves of compound  $(\text{TMCE})_2\text{CdBr}_4$ .

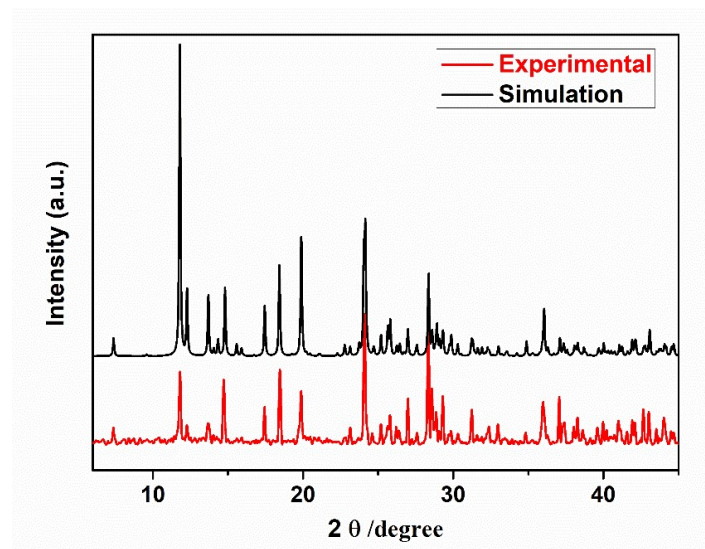

**Fig. S3** The powder X-ray diffraction (PXRD) pattern for compound  $(\text{TMCE})_2\text{CdBr}_4$ .

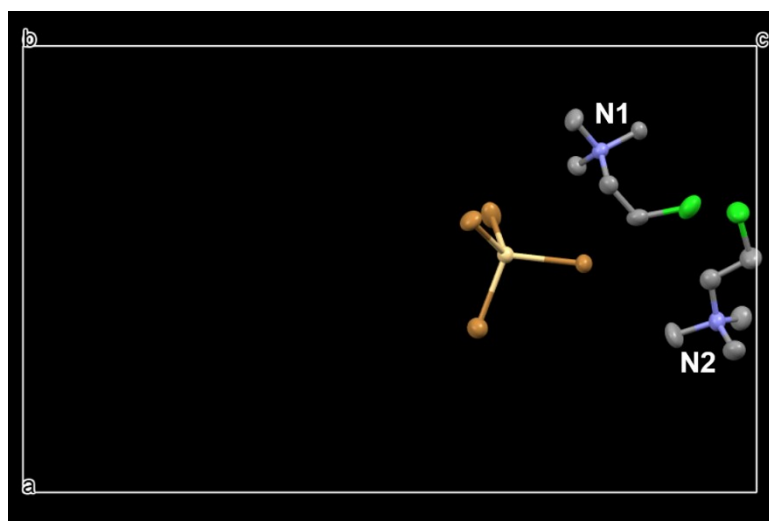

**Fig. S4** The molecular structure of  $(\text{TMCE})_2\text{CdBr}_4$  at 223 K.

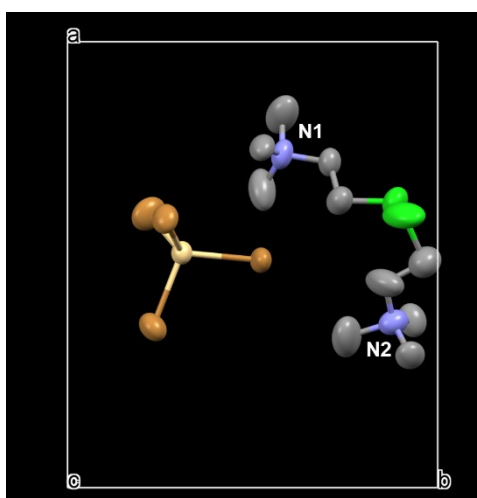

**Fig. S5** The molecular structure of  $(\text{TMCE})_2\text{CdBr}_4$  at 300 K.

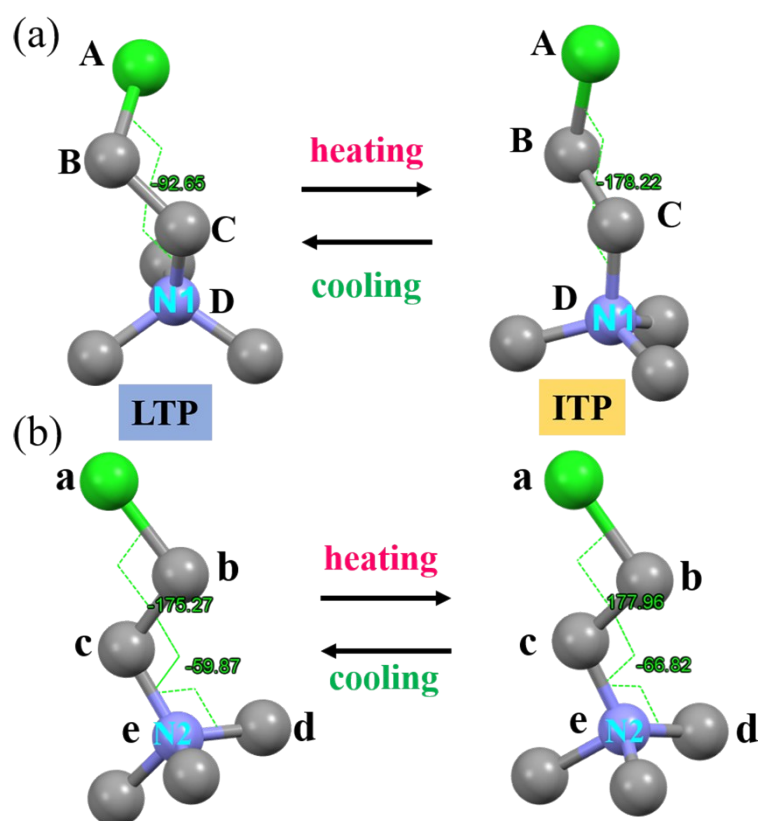

**Fig. S6** Conformational transitions of two cations labeled (a) N1 and (b) N2 between low-temperature phase (LTP) and intermediate temperature phase (ITP). For convenience, A, B, C, and D represent the atoms that measured torsions of organic cation (N1). a, b, c, d, e represents the atoms that measured torsions of organic cation (N2). For molecular N1, the measured torsion of ‘ABCD’ is from  $-92.65^\circ$  (LTP) to  $-179.22^\circ$  (ITP); for molecular N2, the measured torsions of ‘abc’ is from  $-175.27^\circ$  (LTP) to  $-177.96^\circ$  (ITP) and ‘bcd’ is from  $-59.87^\circ$  (LTP) to  $-66.82^\circ$  (ITP). They both have obvious conformational changes.

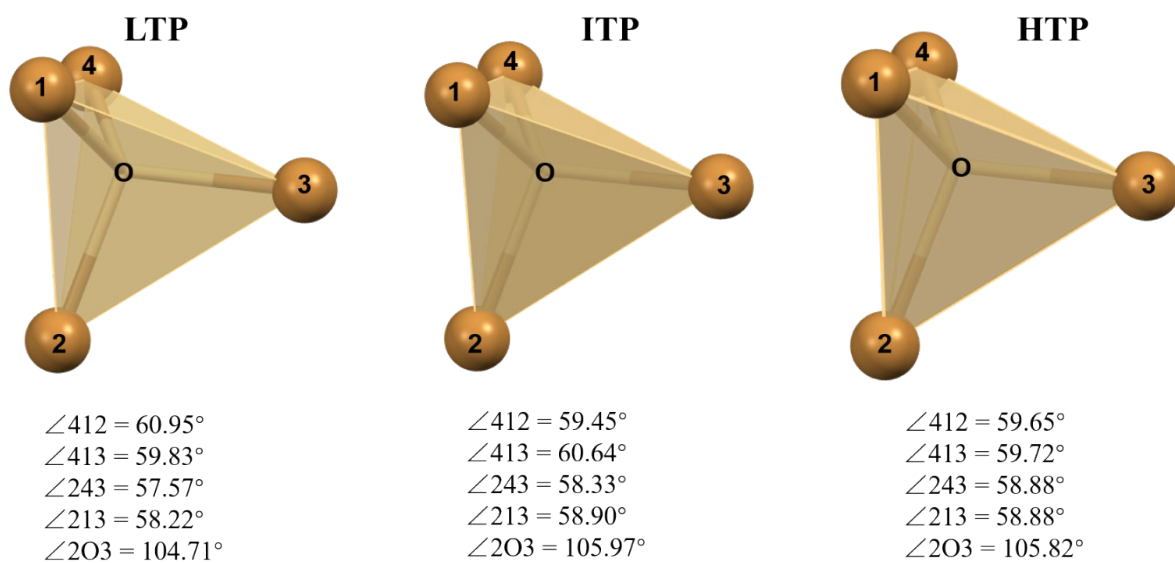

**Fig. S7** The  $[\text{CdBr}_4]^{2-}$  tetrahedral distortion of different phases (LTP, ITP, HTP). For convenience, Br was marked 1, 2, 3, and 4 to be used to label angles, Cd was labeled as O.

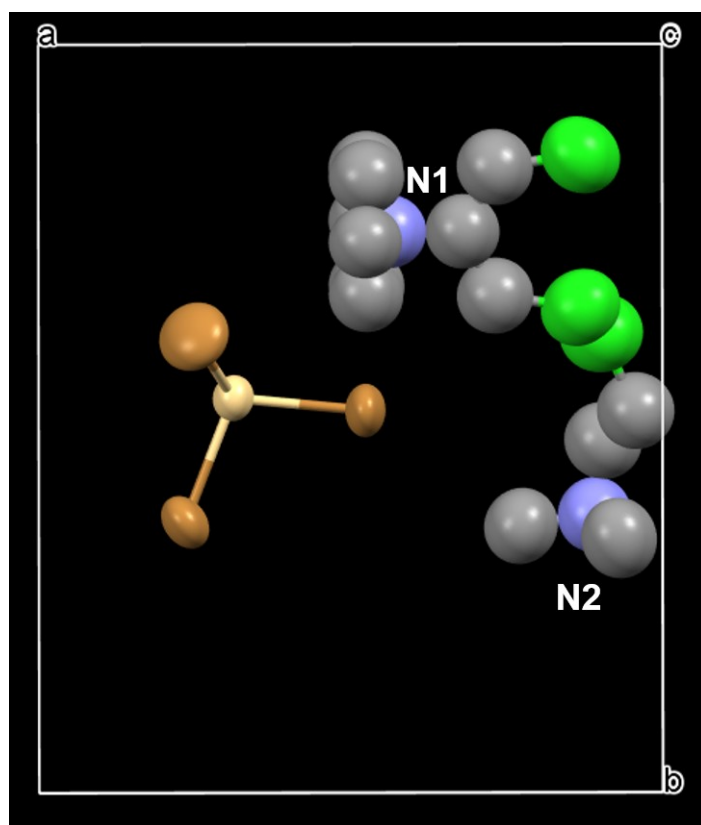

**Fig. S8** The molecular structure of  $(\text{TMCE})_2\text{CdBr}_4$  at 373 K.

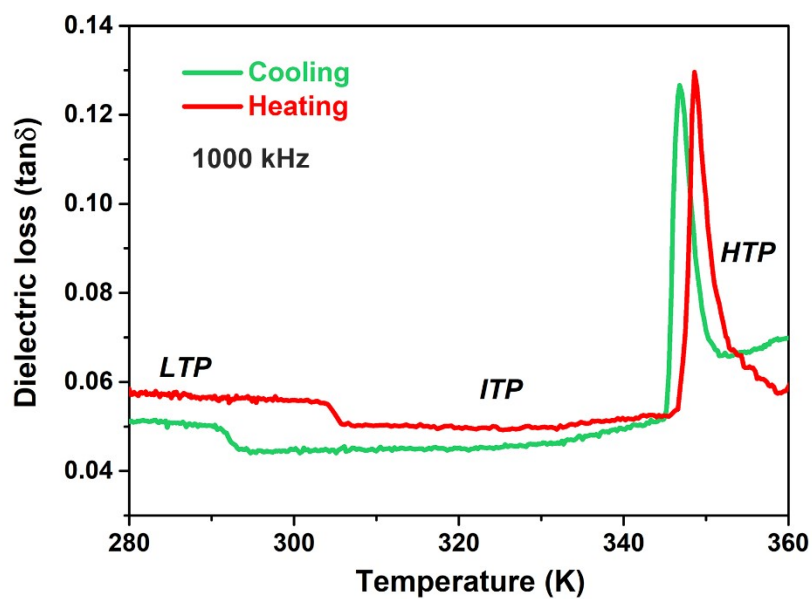

**Fig. S9** The temperature dependence of the dielectric loss ( $\tan\delta$ ) at 1000 kHz.

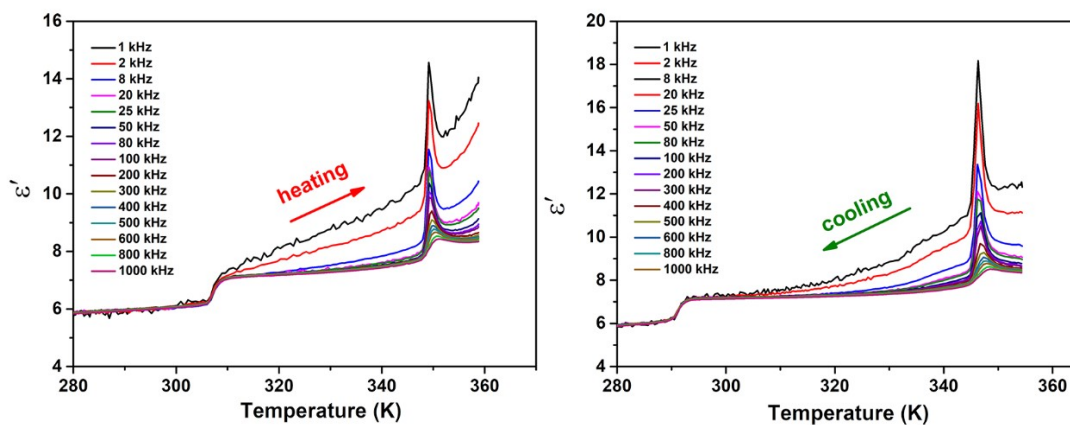

**Fig. S10** The temperature dependence of the dielectric constant for polycrystalline sample  $(\text{TMCE})_2\text{CdBr}_4$  in the heating and cooling process at selected frequencies 1-1000 kHz.

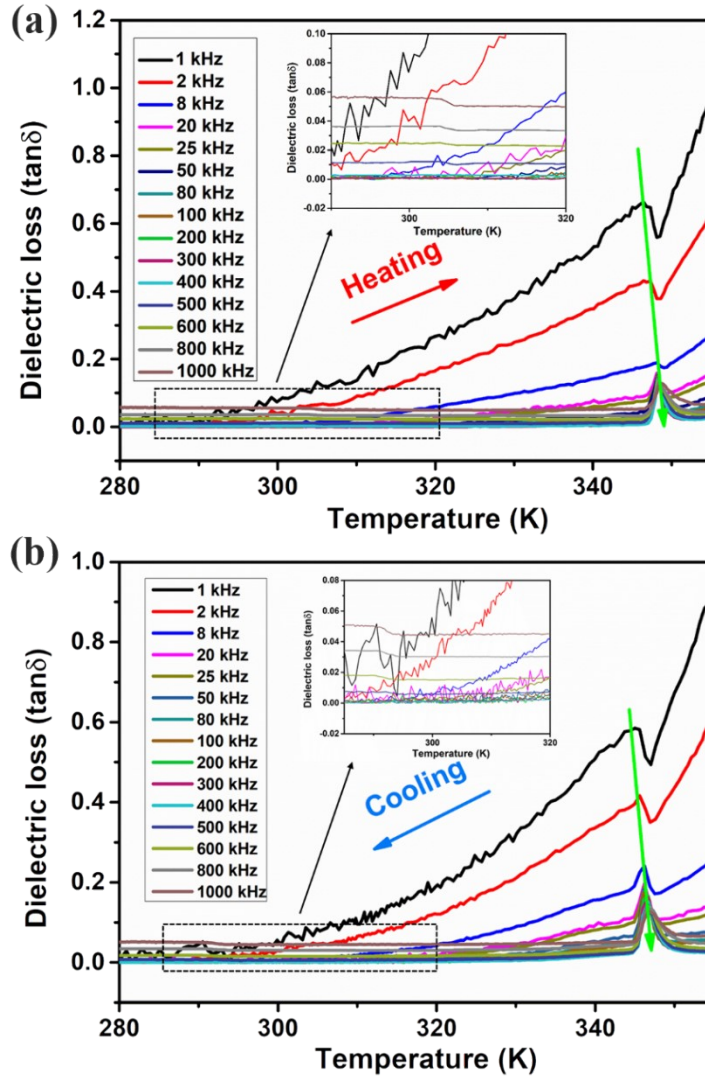

**Fig. S11** The temperature dependence of the dielectric loss ( $\tan\delta$ ) for polycrystalline sample  $(\text{TMCE})_2\text{CdBr}_4$  in the (a) heating and (b) cooling process at selected frequencies 1-1000 kHz. The inset figure is an enlarged view of the temperature-dependent dielectric loss ( $\tan\delta$ ) of the first phase transition.

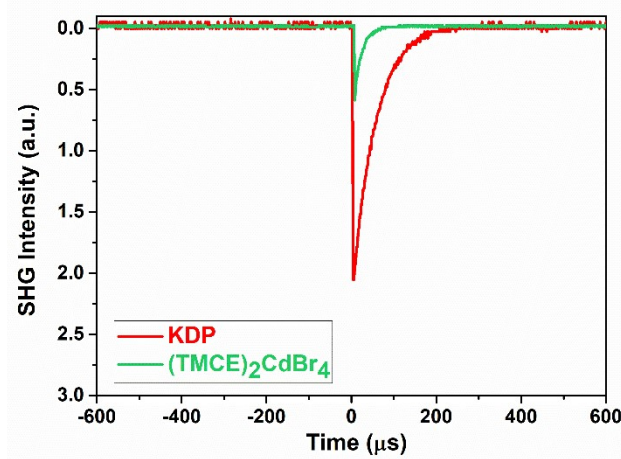

**Fig. S12** SHG signals of  $(\text{TMCE})_2\text{CdBr}_4$  as compared to the KDP reference.



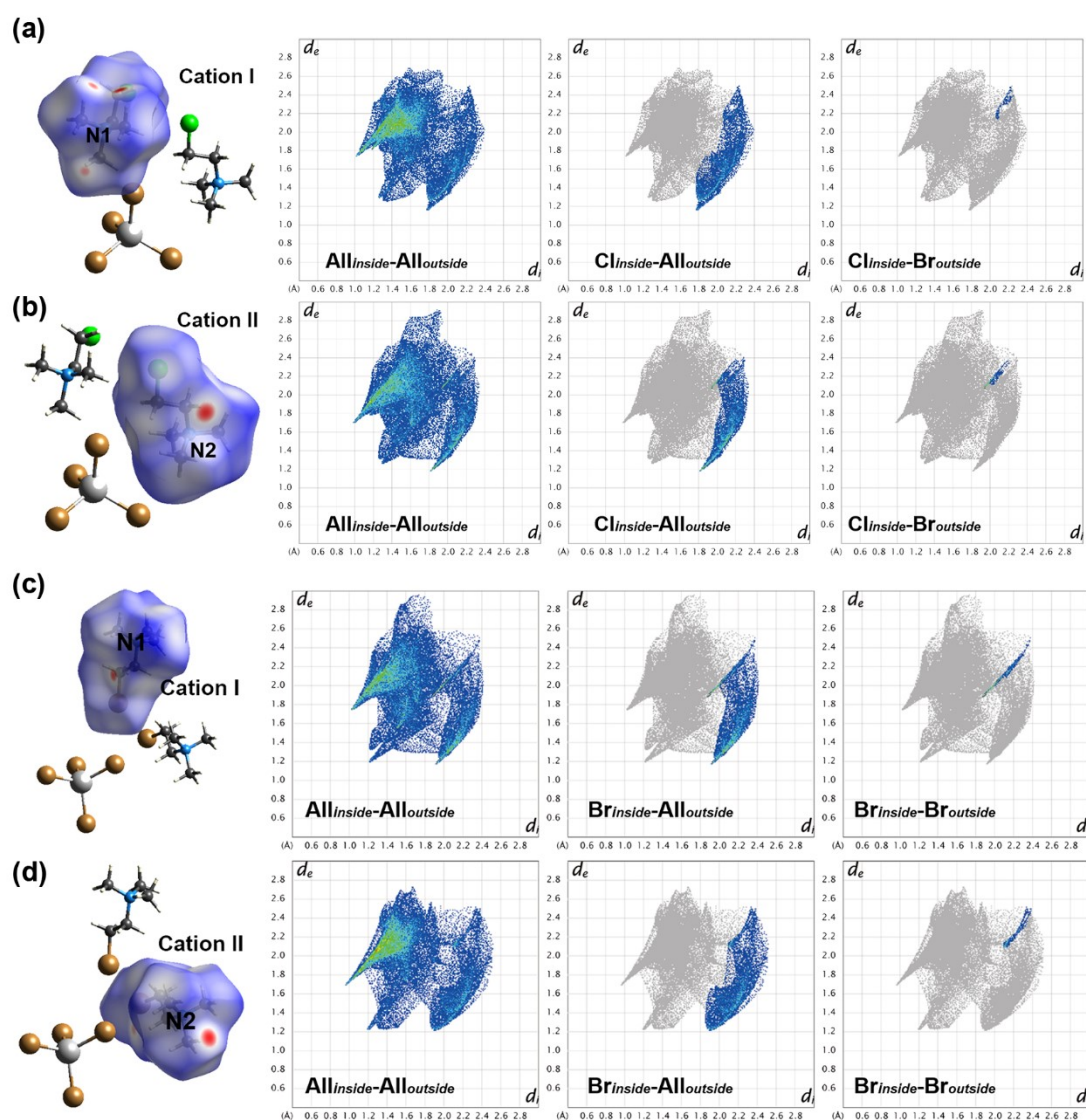

**Fig. S13** 2D fingerprint plots for TMCE cations (a: cation I, b: cation II) of  $(\text{TMCE})_2\text{CdBr}_4$  at 300 K. 2D fingerprint plots for TMBE cations (c: cation I, d: cation II) of  $(\text{TMBE})_2\text{CdBr}_4$  at 293 K. The more intense color means a stronger interaction.

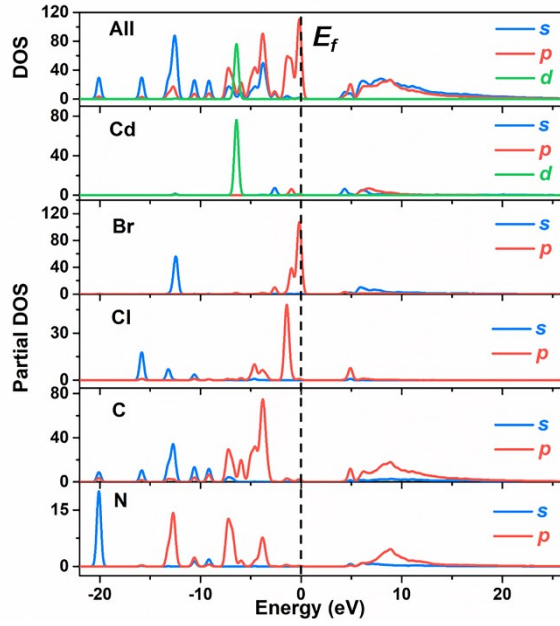

Fig. S14 The DOS and partial DOS plots of  $(\text{TMCE})_2\text{CdBr}_4$ .

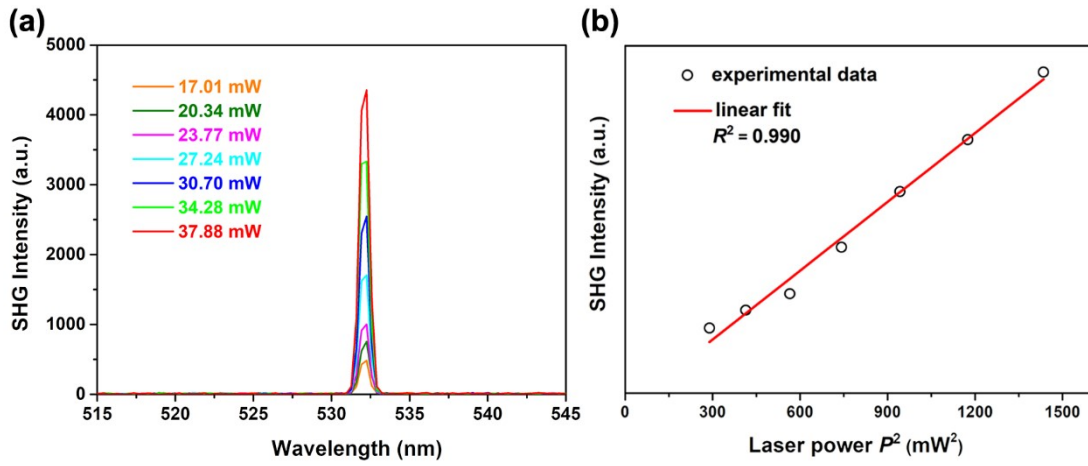

Fig. S15 The power dependence of SHG intensity of  $(\text{TMCE})_2\text{CdBr}_4$ .

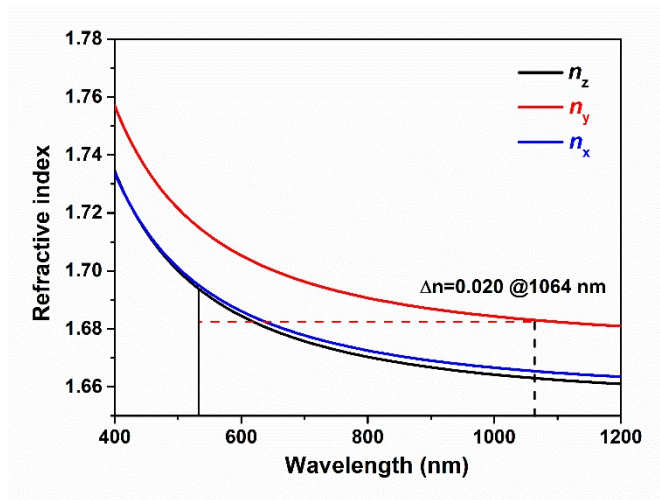

Fig. 16 The wavelength-dependent refractive indices of  $(\text{TMCE})_2\text{CdBr}_4$

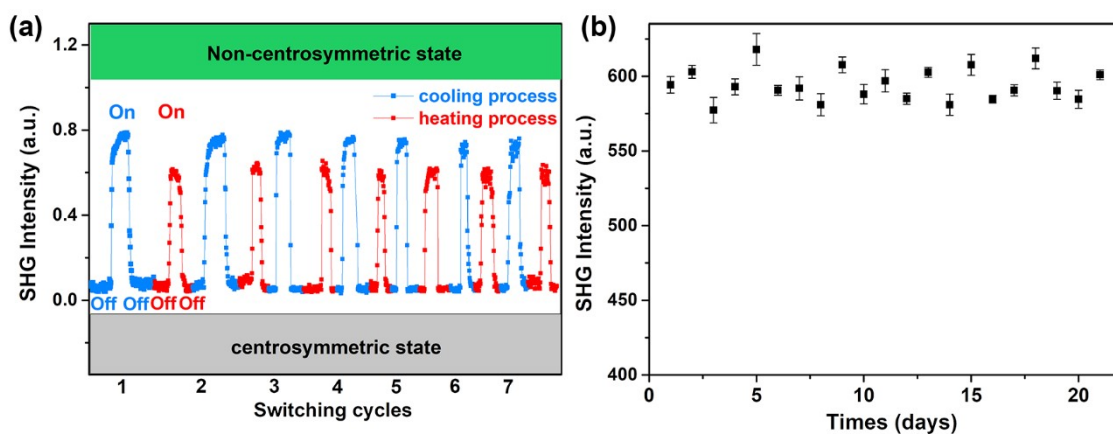

**Fig. S17** (a) The reversible and recoverable switching of SHG effects of  $(\text{TMCE})_2\text{CdBr}_4$ . (b) The chemical stability of SHG effect of  $(\text{TMCE})_2\text{CdBr}_4$ .

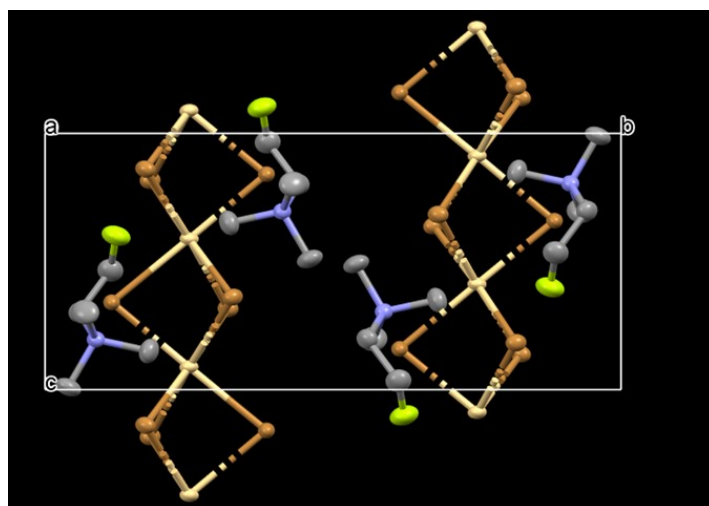

**Fig. S18** The molecular structure of  $\text{TMFECdBr}_3$ .

### References:

- 1 J. Lin, M. H. Lee, Z.P. Liu, C. T. Chen and C. J. Pickard, Mechanism for linear and nonlinear optical effects in b-BaB<sub>2</sub>O<sub>4</sub> crystals, *Phys. Rev. B.*, 1999, **60**, 13380–13389.
- 2 F. Liang, L. Kang, X. Zhang, M. Lee, Z. Lin and Y.Wu, Molecular Construction Using  $(\text{C}_3\text{N}_3\text{O}_3)^{3-}$  Anions: Analysis and Prospect for Inorganic Metal Cyanurates Nonlinear Optical Materials, *Cryst. Growth. Des.*, 2017, **17**, 4015–4020.
- 3 W. J. Wei, X. X. Jiang, L.Y. Dong, W. W. Liu, X.B. Han, Y. Qin, K. Li, W. Li, Z.S. Lin, X.H. Bu and P. X. Lu, Regulating Second-Harmonic Generation by van der Waals Interactions in Two-dimensional Lead Halide Perovskite Nanosheets, *J. Am. Chem. Soc.*, 2019, **141**, 9134–9139.
